# Supplementary material for: Epsilon-poly-l-lysine conjugated erythromycin for enhanced antibiotic therapy
Source: Royal Society of Chemistry journal article supplement (doi:10.1039/d3ra03168c), 2023-01-01
Supplement: d3ra03168c1.pdf [file d3ra03168c1.pdf]

# Electronic Supplementary Information for

## Epsilon-poly-L-lysine conjugated erythromycin for enhanced antibiotic therapy

Jie Yu,<sup>a</sup> Danwei Cen,<sup>b</sup> Yongcheng Chen,<sup>c</sup> Hailan Zhao,<sup>a</sup> Mengyue Xu,<sup>a</sup> Sulan Wu,<sup>a</sup> Shuo Wang,<sup>\*b</sup> Qiao Jin,<sup>c</sup> Ting Shen<sup>\*d</sup>

<sup>a</sup> Center for Rehabilitation Medicine, Department of Ophthalmology, Zhejiang Provincial People's Hospital, Affiliated People's Hospital, Hangzhou Medical College, Hangzhou, 310014, China

<sup>b</sup> Faculty of Pharmacy, Zhejiang Pharmaceutical University, Ningbo 315100, China.  
E-mail: wangs@zjpu.edu.cn (S. Wang)

<sup>c</sup> MOE Key Laboratory of Macromolecule Synthesis and Functionalization of Ministry of Education, Department of Polymer Science and Engineering, Zhejiang University, Hangzhou, 310058, China.

<sup>d</sup> Eye Center, The Second Affiliated Hospital, School of Medicine, Zhejiang University, Zhejiang Provincial Key Laboratory of Ophthalmology, Zhejiang Provincial Clinical Research Center for Eye Diseases, Zhejiang Provincial Engineering Institute on Eye Diseases, Hangzhou, 310009 China. E-mail: medicat@zju.edu.cn (T. Shen)

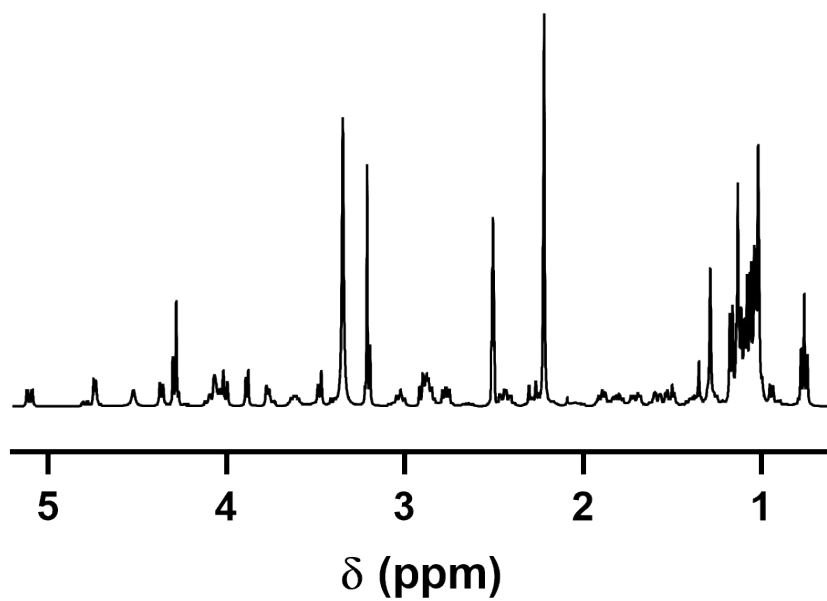

Figure S1. The  $^1\text{H}$  NMR spectrum of EM-COOH in DMSO- $d_6$ .

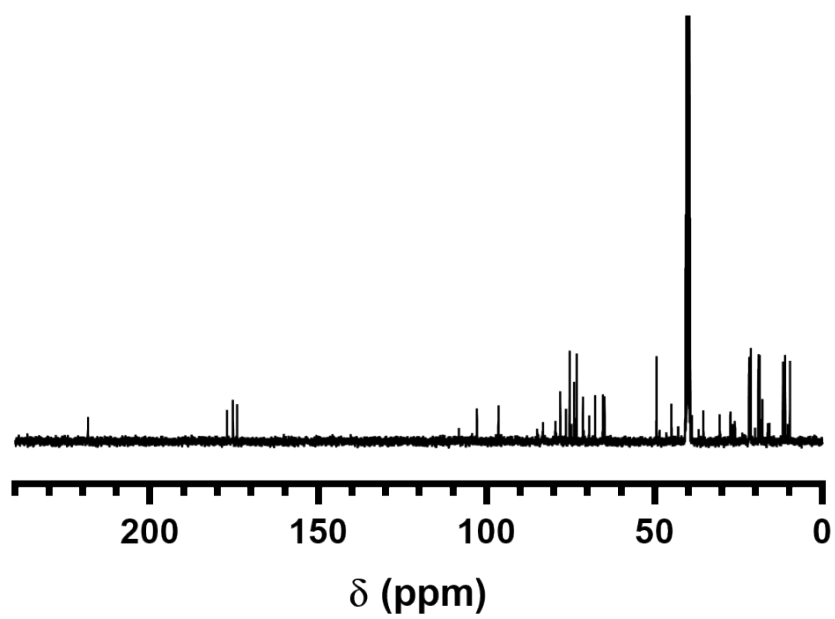

Figure S2. The  $^{13}\text{C}$  NMR spectrum of EM-COOH in DMSO- $d_6$ .

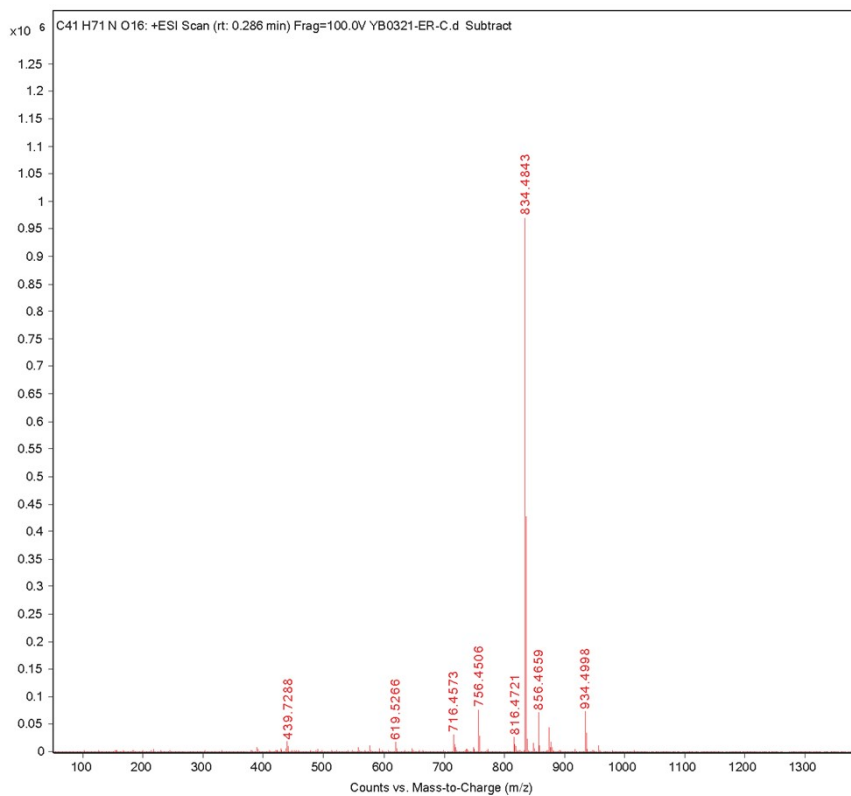

Figure S3. The ESI-MS spectrum of EM-COOH. 833.26 in theory,  $[M+H]^+$  found 834.48
